# Supplementary material for: Anion assisted conformationally guided self-assemblies of multi-component cocrystals of dioxime
Source: Royal Society of Chemistry journal article supplement (doi:10.1039/c6ce01157h), 2016-01-01
Supplement: c6ce01157h1.pdf [file c6ce01157h1.pdf]

## Supporting Information

Anion assisted conformational guided self-assemblies of multi-component cocrystals of dioxime

Arup Tarai, Jubaraj B. Baruah\*

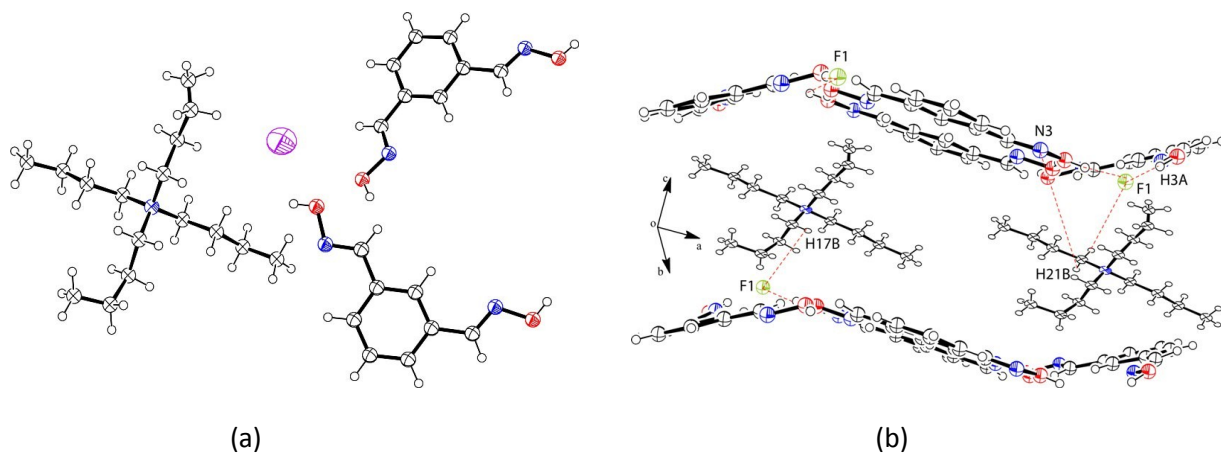

Figure 1S: (a) Asymmetric unit of cocrystal  $2(\text{H}_2\text{BNAD})\cdot(\text{TBAF})$ . (b) Cation encapsulation by oxime molecules in  $2(\text{H}_2\text{BNAD})\cdot(\text{TBAF})$ .

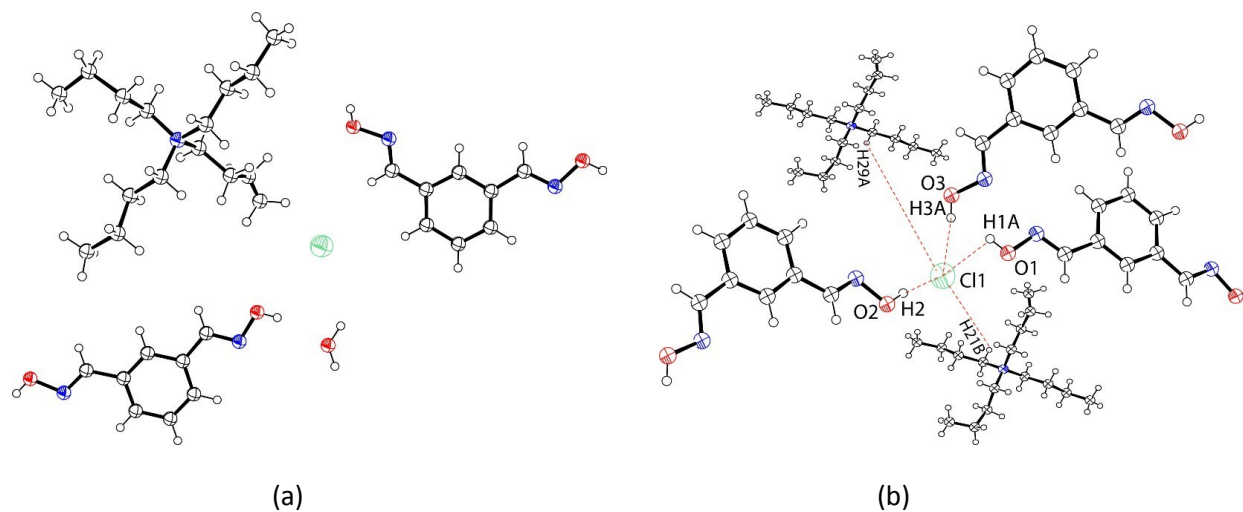

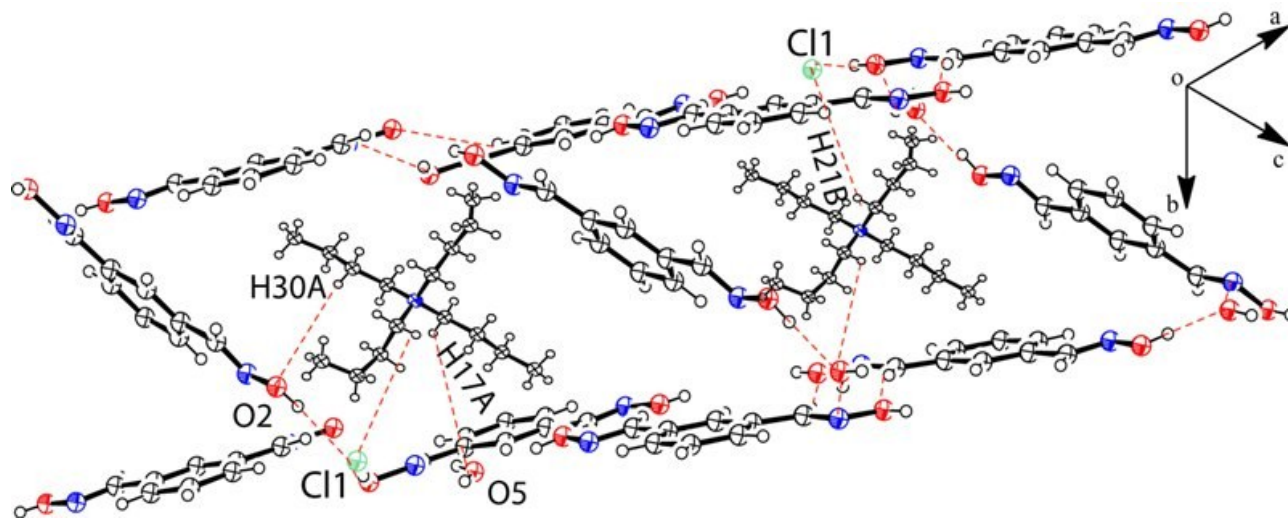

(c)

Figure 2S: (a) Asymmetric unit of cocrystal  $2(\text{H}_2\text{BNAD})\cdot(\text{TBACl})\cdot\text{H}_2\text{O}$ . (b) Coordination environment of chloride ion in cocrystal  $2(\text{H}_2\text{BNAD})\cdot(\text{TBACl})\cdot\text{H}_2\text{O}$ . (c) Cation encapsulation by oxime molecules in  $2(\text{H}_2\text{BNAD})\cdot(\text{TBACl})\cdot\text{H}_2\text{O}$ .

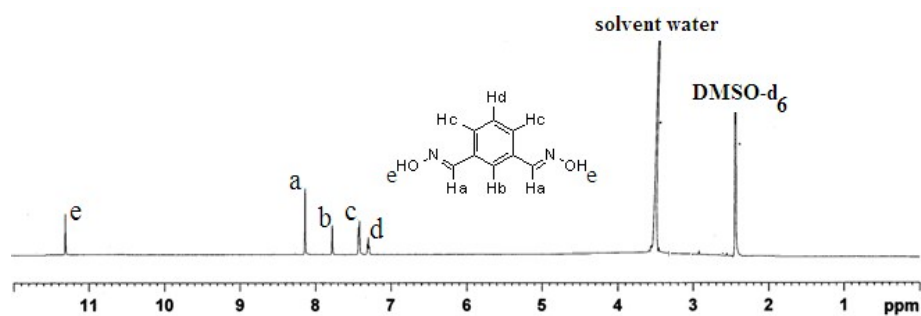

Figure 3S:  $^1\text{H-NMR}$  (600 MHz,  $\text{DMSO-d}_6$ ) of  $\text{H}_2\text{BNAD}$ .

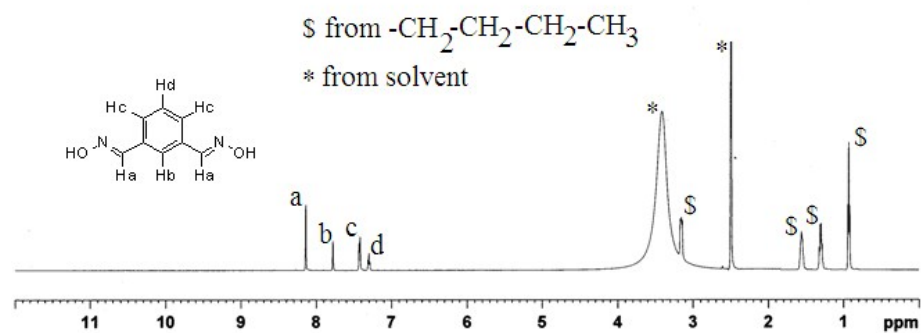

Figure 4S:  $^1\text{H-NMR}$  (600 MHz,  $\text{DMSO-d}_6$ ) of salt  $(\text{TBA})(\text{HBNAD})\cdot\text{H}_2\text{BNAD}$ .

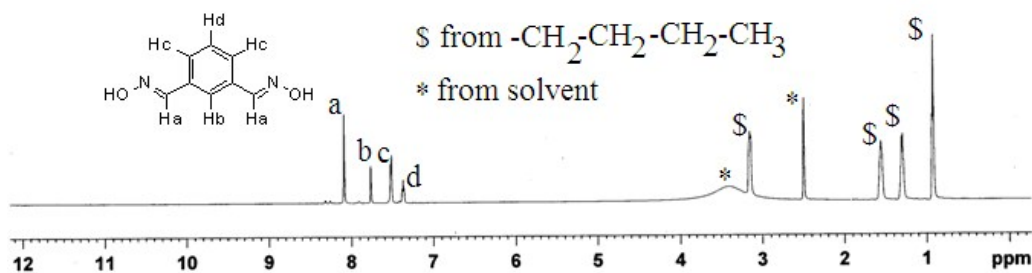

Figure 5S:  $^1\text{H}$ NMR (600 MHz,  $\text{DMSO-d}_6$ ) of cocystal  $2(\text{H}_2\text{BNAD}).(\text{TBAF})$ .

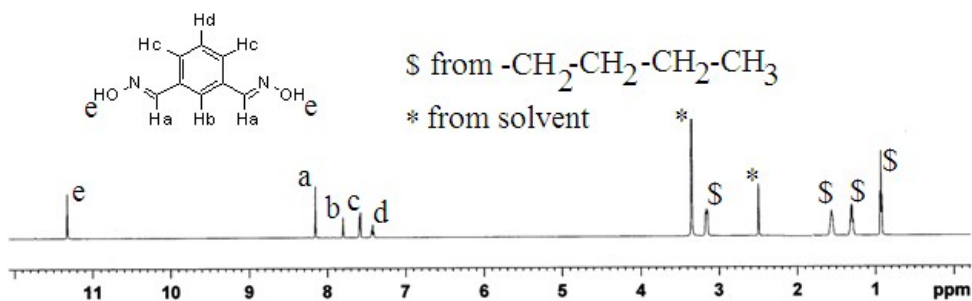

Figure 6S:  $^1\text{H}$ -NMR (600 MHz,  $\text{DMSO-d}_6$ ) of cocystal  $2(\text{H}_2\text{BNAD}).(\text{TBACl}).\text{H}_2\text{O}$ .

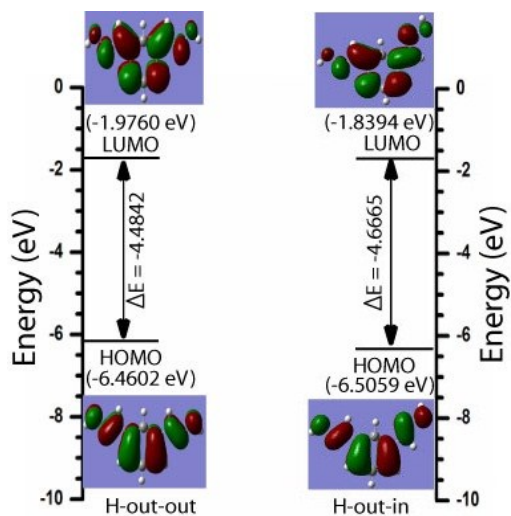

Figure 7S: HOMO and LUMO gap in two conformers of 1,3-Benzenedialdoxime calculated at by DFT using B3LYP/6-31+G (d,p) as basis set.

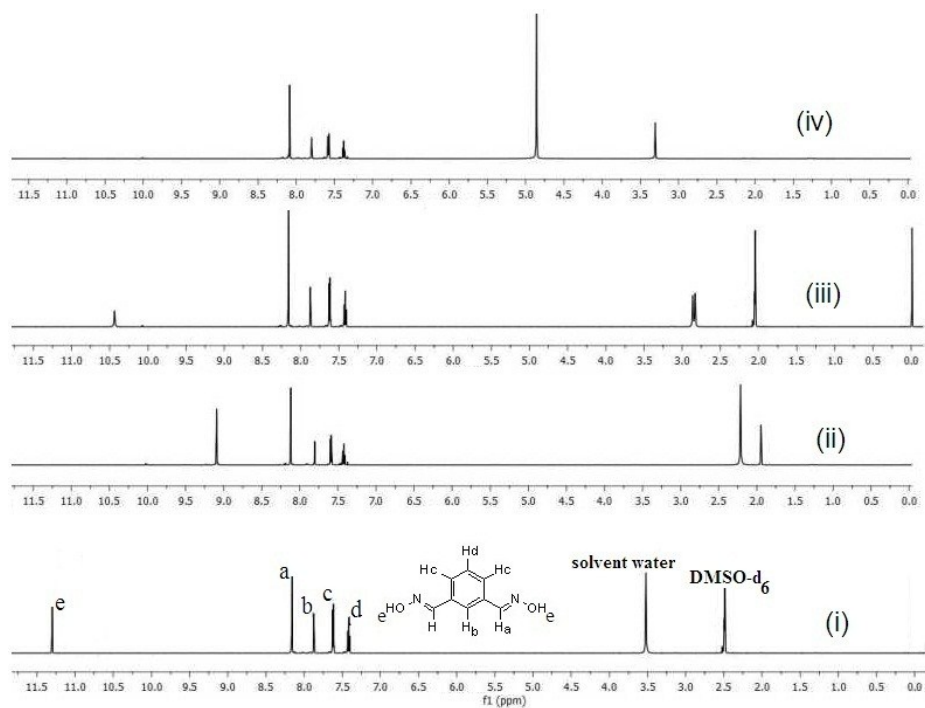

Figure 8S: Solvent dependent  $^1\text{H-NMR}$  spectra of 1,3-Benzenedialdoxime ( $\text{H}_2\text{BNAD}$ ) in (i)  $\text{DMSO-d}_6$ , (ii)  $\text{Acetonitrile-d}_3$ , (iii)  $\text{Acetone-d}_6$  and (iv)  $\text{Methanol-d}_4$ .

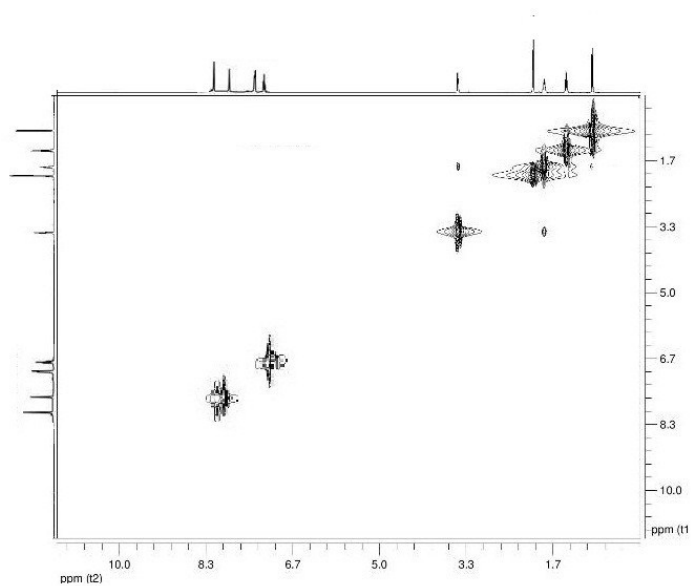

Figure 9S:  $^1\text{H-NOESY}$  spectra (600MHz,  $\text{Acetone-d}_6$ ) of  $2(\text{H}_2\text{BNAD})\cdot(\text{TBAF})$ .

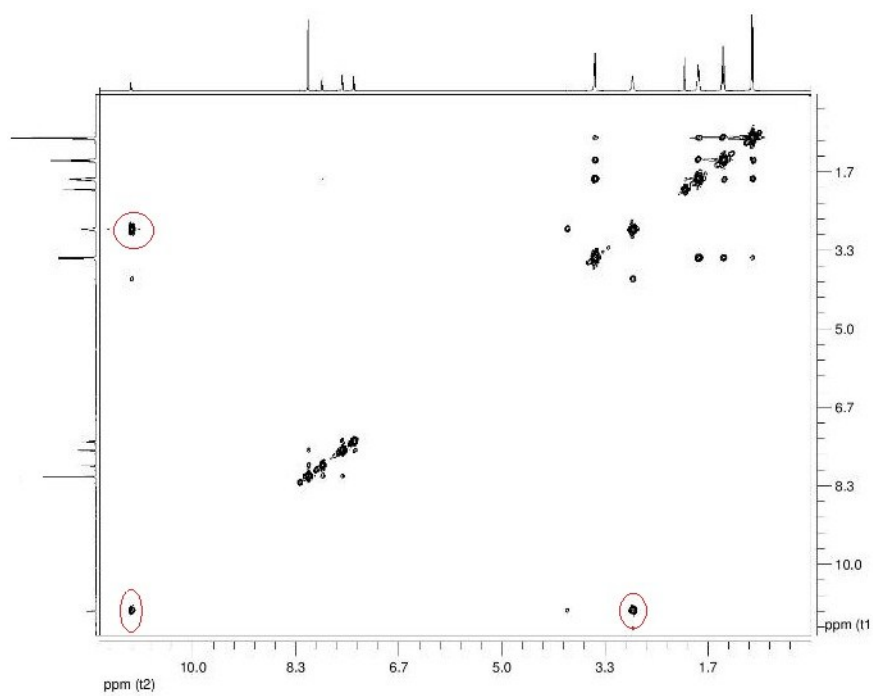

Figure 10S:  $^1\text{H}$ -NOESY spectra (600MHz, Acetone- $\text{d}_6$ ) of  $2(\text{H}_2\text{BNAD}) \cdot (\text{TBACl}) \cdot \text{H}_2\text{O}$ .

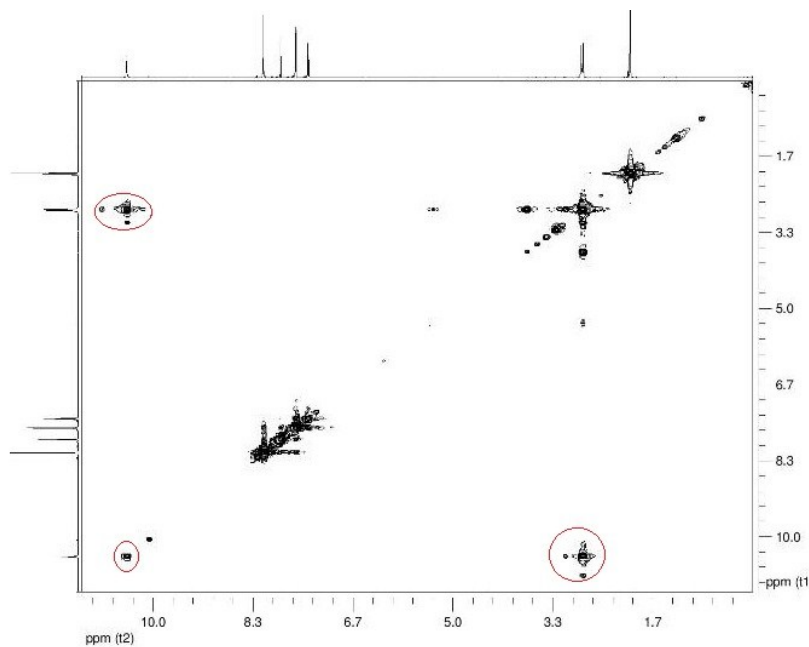

Figure 11S:  $^1\text{H}$ -NOESY spectra (600MHz, Acetone- $\text{d}_6$ ) of  $\text{H}_2\text{BNAD}$ .

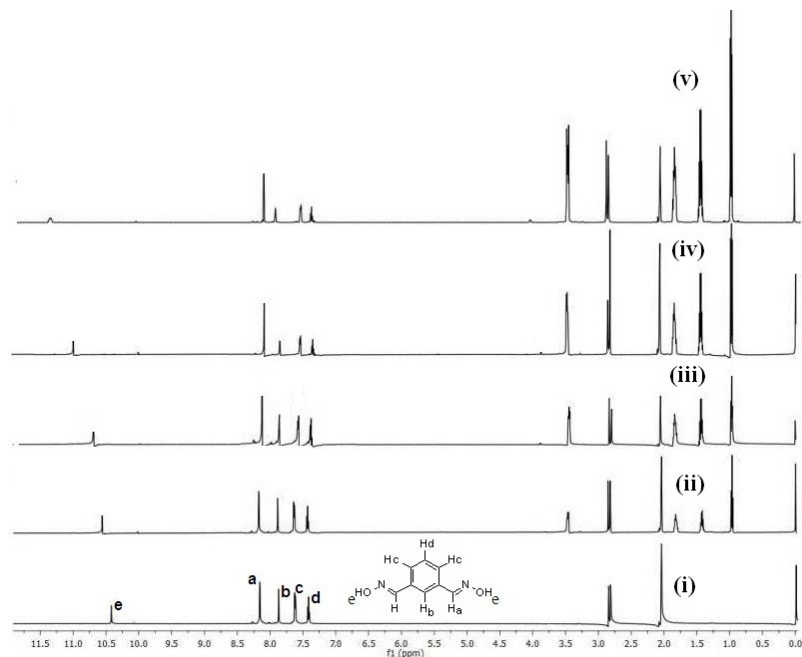

Figure 12S:  $^1\text{H}$ -NMR (Acetone- $\text{d}_6$ ) spectra during titration of ( $\text{H}_2\text{BNAD}$ ) with tetrabutyl ammonium chloride (i) 0.0, (ii) 0.5, (iii) 1 (iv) 1.5, (v) 2 equivalents.

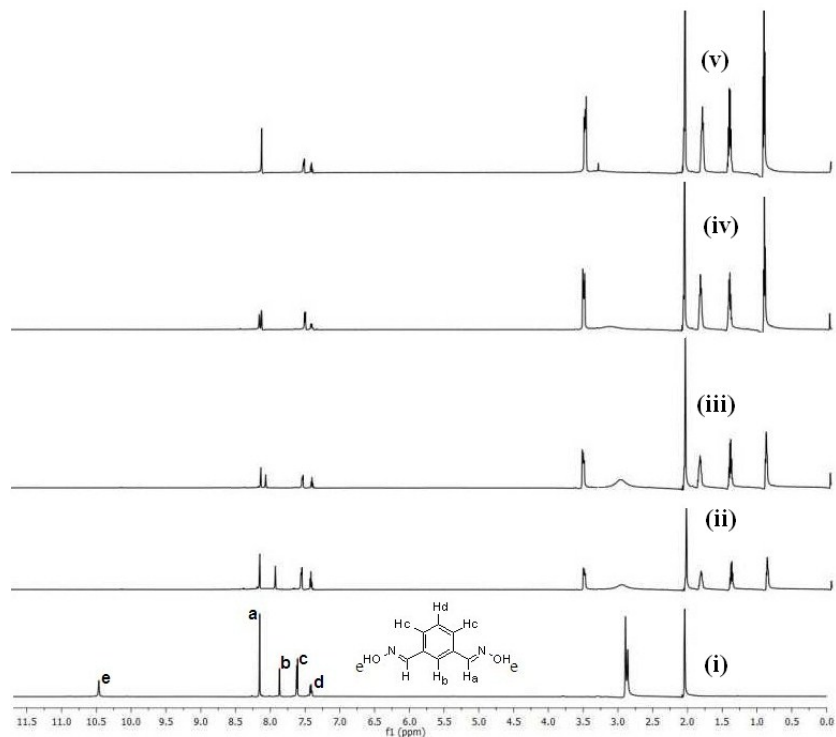

Figure 13S:  $^1\text{H-NMR}$  ( $\text{Acetone-}d_6$ ) spectra during titration of 1,3-Benzenedialdoxime ( $\text{H}_2\text{BNAD}$ ) with tetrabutyl ammonium fluoride (i) 0.0, (ii) 0.5, (iii) 1 (iv) 1.5, (v) 2 equivalents.

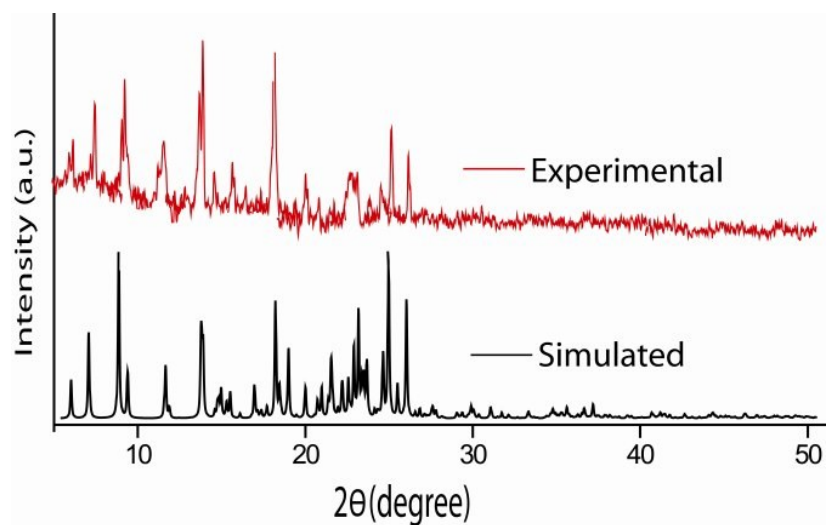

Figure 14S: PXRD of  $(\text{TBA})(\text{HBNAD})\cdot\text{H}_2\text{BNAD}$  (Red = Experimental, Black = Simulated), Simulated pattern generated from CIF file.

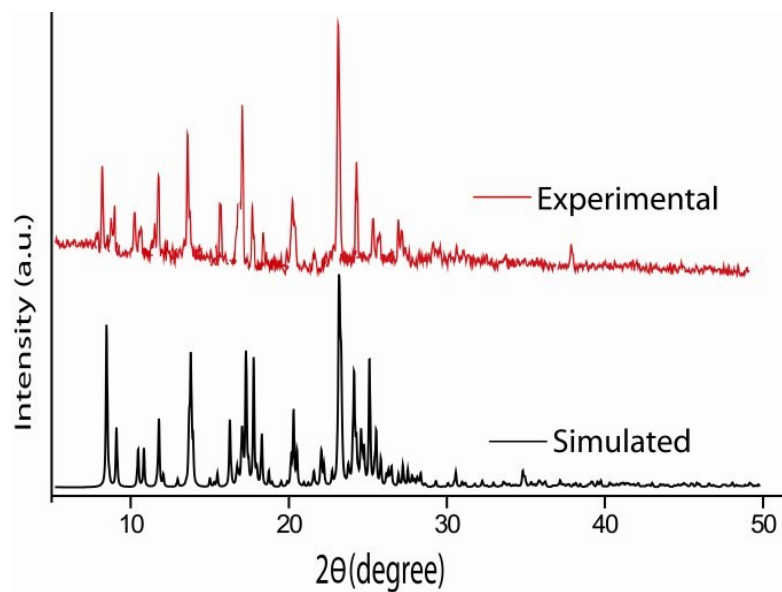

Figure 15S: PXRD of 2(H<sub>2</sub>BNAD).(TBAF) (Red = Experimental, Black = Simulated), Simulated pattern generated from CIF file software.

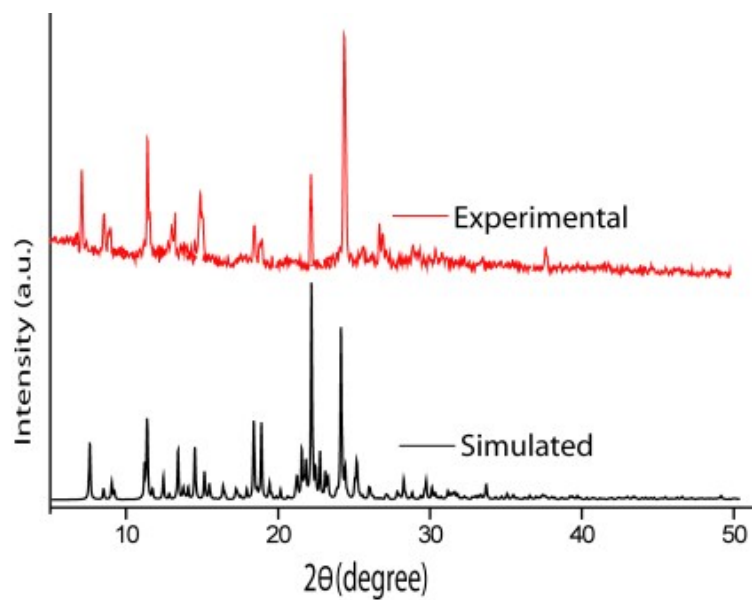

Figure 16S: PXRD of 2(H<sub>2</sub>BNAD).(TBACl).H<sub>2</sub>O (Red = Experimental, Black = Simulated), Simulated pattern generated from CIF file .



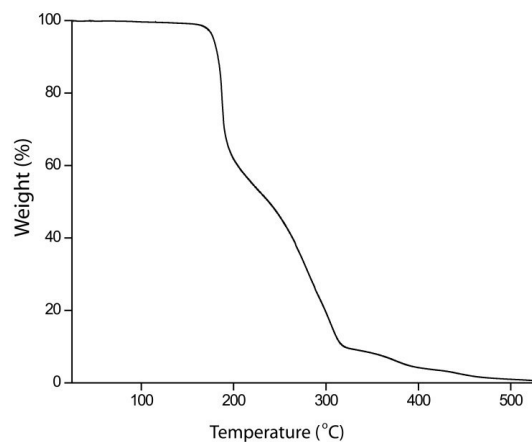

Figure 17S: TGA of Cocystal (TBA)(HBNAD).H<sub>2</sub>BNAD.

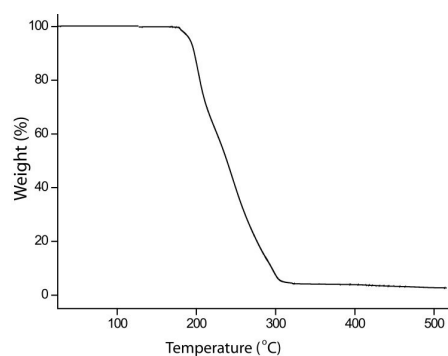

Figure 18S: TGA of cocystal 2(H<sub>2</sub>BNAD).(TBAF).

Table 1S: Hydrogen bond parameters of the crystals

| Cocrystal.                                          | D-H...A                               | d <sub>D-H</sub> (Å) | d <sub>H...A</sub> (Å) | d <sub>D...A</sub> (Å) | ∠D-H...A (°) |
|-----------------------------------------------------|---------------------------------------|----------------------|------------------------|------------------------|--------------|
| 2(H <sub>2</sub> BNAD).<br>(TBACl).H <sub>2</sub> O | O(1)-H(1A) ··· Cl(1) [1-x,-y,-z]      | 0.82                 | 2.22                   | 3.039(3)               | 172          |
|                                                     | O(2)-H(2) ··· Cl(1) [1-x,1/2+y,1/2-z] | 0.82                 | 2.22                   | 3.036(3)               | 171          |
|                                                     | O(3)-H(3A) ··· Cl(1) [-x,1-y,-z]      | 0.82                 | 2.28                   | 3.078(3)               | 166          |
|                                                     | O(4)-H(4A) ··· O(5)                   | 0.82                 | 1.86                   | 2.681(5)               | 176          |
|                                                     | O(5)-H(5A) ··· N(1) [-x,1/2+y,1/2-z]  | 0.89(3)              | 2.12(3)                | 2.998(7)               | 170(6)       |
|                                                     | O(5)-H(5B) ··· N(3) [-x,-1/2+y,1/2-z] | 0.85(4)              | 2.31(4)                | 3.146(6)               | 171(4)       |
| 2(H <sub>2</sub> BNAD).<br>(TBAF)                   | O(1)-H(1A) ··· F(1) [x,1/2-y,-1/2+z]  | 0.89(3)              | 1.66(3)                | 2.545(3)               | 176(3)       |
|                                                     | O(2)-H(2) ··· F(1)                    | 0.82                 | 1.71                   | 2.525(3)               | 173          |
|                                                     | O(3)-H(3A) ··· F(1) [-x,1/2+y,1/2-z]  | 0.82                 | 1.64                   | 2.460(3)               | 177          |
|                                                     | O(4)-H(4A) ··· O(3) [-x,1-y,-z]       | 0.82                 | 2.00                   | 2.797(3)               | 164          |
| (TBA)(HBNAD).<br>H <sub>2</sub> BNAD                | O(1)-H(1A) ··· N(3) [x,-1+y,z]        | 0.82                 | 1.98                   | 2.797(4)               | 171          |
|                                                     | O(2)-H(2) ··· O(3) [1-x,2-y,1-z]      | 0.82                 | 1.78                   | 2.598(4)               | 171          |
|                                                     | O(4)-H(4A) ··· O(3) [-x,2-y,-z]       | 0.82                 | 1.77                   | 2.567(a)               | 165          |
